# Supplementary material for: Cyclic and acyclic acetals as safe, nonaqueous formaldehyde equivalents for the synthesis of pillararenes
Source: Royal Society of Chemistry journal article supplement (doi:10.1039/d4cc03306j), 2024-01-01
Supplement: d4cc03306j1.pdf [file d4cc03306j1.pdf]

## Electronic Supplementary Information

# Cyclic and acyclic acetals as safe, nonaqueous formaldehyde equivalents for the synthesis of pillararenes

Babitha Machireddy<sup>a</sup> and Maggie He<sup>\*a</sup>

<sup>a</sup>Department of Chemistry and Biochemistry, University of Arkansas, Fayetteville, AR 72701, United States.

Email: [maggiehe@uark.edu](mailto:maggiehe@uark.edu)

## Table of Contents

|    |                                                                          |     |
|----|--------------------------------------------------------------------------|-----|
| 1. | General Methods.....                                                     | S3  |
| 2. | Experimental Methods.....                                                | S3  |
| 3. | Pillararene Formation Using Different Forms of Paraformaldehyde .....    | S5  |
| 4. | NMR Data .....                                                           | S5  |
| 5. | Pillararene Synthesis in $\text{CHCl}_3$ with Different Stabilizers..... | S12 |
| 6. | References .....                                                         | S13 |

## 1. General Methods

1,2-Dichloroethane (DCE), 1,2-dichlorobenzene (*o*-DCB) and boron trifluoride etherate (BF<sub>3</sub>·OEt<sub>2</sub>) were purchased from Beantown Chemicals. Dichloromethane (CH<sub>2</sub>Cl<sub>2</sub>), chloroform (CHCl<sub>3</sub>), ethyl acetate (EtOAc) and hexanes (Hex) were purchased from VWR. 1,4-Diethoxybenzene (DEB), diethoxymethane (DEM), dimethoxymethane, 1,3-dioxolane, chlorocyclohexane and 1,3,5-trioxane were purchased from Thermo Scientific Chemicals. All commercially available materials were used as received without further purification.

Compounds were characterized by <sup>1</sup>H and <sup>13</sup>C nuclear magnetic resonance (NMR), and mass spectrometry. NMR spectra were obtained on a Bruker 300 MHz and 400 MHz spectrometer. Chemical shifts (δ) in <sup>1</sup>H NMR were reported in parts per million (ppm) relative to residual proton signals in CDCl<sub>3</sub> (7.26 ppm) at room temperature. Chemical shifts (δ) in <sup>13</sup>C NMR were reported in parts per million (ppm) relative to residual proton signals in CDCl<sub>3</sub> (77.2 ppm) at room temperature. NMR splitting parameters are indicated as follows: s, singlet; d, doublet; t, triplet; q, quartet; m, multiplet. MALDI-TOF mass spectra were acquired using Bruker Daltonics - Ultraflex II MALDI TOF/TOF.

## 2. Experimental Methods

### 2.1. General Method A for Catalyst Screening

To a solution of 1,4-diethoxybenzene (5.00 mmol, 1 equiv) and diethoxymethane (6.25 mmol, 1.25 equiv) in CH<sub>2</sub>Cl<sub>2</sub> (100 mL), the appropriate acid catalyst was added all at once at room temperature. After 30 min, the reaction mixture was quenched and washed with 0.1 M NaOH (aq) solution (3 × 200 mL). The organic layer was dried over Na<sub>2</sub>SO<sub>4</sub> and concentrated under reduced pressure. The crude mixture was adsorbed onto silica gel and the product was purified by column chromatography to give ethoxypillar[5]arene, EtO-PA[5] (eluent: CH<sub>2</sub>Cl<sub>2</sub>:Hex - 1:3) and ethoxypillar[6]arene, EtO-PA[6] (eluent: CH<sub>2</sub>Cl<sub>2</sub>:Hex - 3:1) as white solids.

### 2.2. Experimental Methods for Solvent Screening

#### *Ethoxypillararene Synthesis with DCE, CH<sub>2</sub>Cl<sub>2</sub> and CHCl<sub>3</sub>:*

To a solution of 1,4-diethoxybenzene (5.00 mmol, 1 equiv) and diethoxymethane (6.25 mmol, 1.25 equiv) in chlorinated solvent (100 mL), BF<sub>3</sub>·OEt<sub>2</sub> (12.5 mmol, 2.5 equiv) was added all at once at room temperature. After 30 min, the reaction mixture was quenched and purified by general method A.

#### *Ethoxypillararene Synthesis with *o*-DCB:*

To a solution of 1,4-diethoxybenzene (5.00 mmol, 1 equiv) and diethoxymethane (6.25 mmol, 1.25 equiv) in *o*-DCB (100 mL), BF<sub>3</sub>·OEt<sub>2</sub> (12.5 mmol, 2.5 equiv) was added all at once at room temperature. After 30 min, the reaction mixture was quenched and washed with 0.1 M NaOH (aq) solution (3 × 200 mL). The organic layer was collected and dried over Na<sub>2</sub>SO<sub>4</sub>. The reaction mixture was loaded onto a silica gel column packed with hexane. The product was

purified by column chromatography to give 49% yield of EtO-PA[5] (eluent: CH<sub>2</sub>Cl<sub>2</sub>:Hex - 1:3) and 5% yield of EtO-PA[6] (eluent: CH<sub>2</sub>Cl<sub>2</sub>:Hex - 3:1) as white solids.

#### *Ethoxypillararene Synthesis with Chlorocyclohexane:*

To a solution of 1,4-diethoxybenzene (5.00 mmol, 1 equiv) and diethoxymethane (6.25 mmol, 1.25 equiv) in chlorocyclohexane (100 mL), BF<sub>3</sub>·OEt<sub>2</sub> (12.5 mmol, 2.5 equiv) was added all at once at room temperature. After 30 min, the reaction mixture was quenched with Et<sub>3</sub>N (25 mmol). The reaction mixture was loaded onto a silica gel column packed with hexane. The product was purified by column chromatography to give 43% yield of EtO-PA[5] (CH<sub>2</sub>Cl<sub>2</sub>:Hex - 1:3) and 25% yield of EtO-PA[6] (eluent: CH<sub>2</sub>Cl<sub>2</sub>:Hex - 3:1) as white solids.

#### 2.3. General Method for Acetal Screening

To a solution of 1,4-diethoxybenzene (5.00 mmol, 1 equiv) and acetal (6.25 mmol, 1.25 equiv) in DCE (100 mL), BF<sub>3</sub>·OEt<sub>2</sub> (12.5 mmol, 2.5 equiv) was added all at once at room temperature. The reaction mixture was quenched and purified by general method A.

#### 2.4. Pillararene Synthesis from Other Arenes

##### *Methoxypillar[5]arene Synthesis:*

To a solution of 1,4-dimethoxybenzene (5.00 mmol, 1 equiv) and diethoxymethane (6.25 mmol, 1.25 equiv) in DCE (100 mL), BF<sub>3</sub>·OEt<sub>2</sub> (12.5 mmol, 2.5 equiv) was added all at once at room temperature. After 30 min, the reaction mixture was quenched and purified by general method A to give 87% yield of methoxypillar[5]arene, MeO-PA[5] (CH<sub>2</sub>Cl<sub>2</sub>:Hex - 1:1) as a white solid.

##### *2-Bromoethoxypillar[5]arene Synthesis:*

1,4-bis(2-bromoethoxy)benzene was synthesized according to literature procedures.<sup>1</sup> To a solution of 1,4-bis(2-bromoethoxy)benzene (0.50 mmol, 1 equiv) and diethoxymethane (0.625 mmol, 1.25 equiv) in DCE (2.2 mL), BF<sub>3</sub>·OEt<sub>2</sub> (1.25 mmol, 2.5 equiv) was added all at once at 70° C. After 30 min, the reaction mixture was quenched and purified by general method A to give 60% yield of 2-bromoethoxypillar[5]arene, Br-PA[5] (CH<sub>2</sub>Cl<sub>2</sub>:Hex - 2:1) as a white solid.

### 3. Pillararene Formation Using Different Forms of Paraformaldehyde

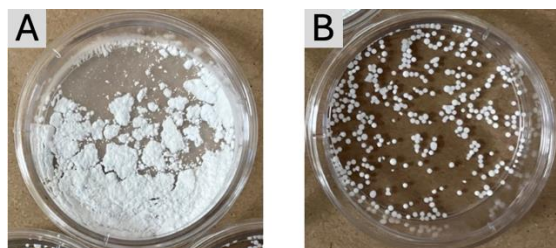

**Figure S1.** Photo of crystalline paraformaldehyde (A) and paraformaldehyde prills (B) taken inside a fume hood. Samples were placed inside a transparent, closed container.

**Table S1.** Dependence of pillar[n]arene synthesis in DCE on the form of paraformaldehyde.

| Entry | 1,4-Dimethoxybenzene (equiv) | Paraformaldehyde (equiv) | BF <sub>3</sub> ·OEt <sub>2</sub> (equiv) | Product                                                              |
|-------|------------------------------|--------------------------|-------------------------------------------|----------------------------------------------------------------------|
| 1     | 1.0                          | 3.0 (crystalline)        | 1.0                                       | 63% Methoxypillar[5]arene                                            |
| 2     | 1.0                          | 3.0 (prill)              | 1.0                                       | Mostly unreacted 1,4-dimethoxybenzene and insoluble linear oligomers |

### 4. NMR Data

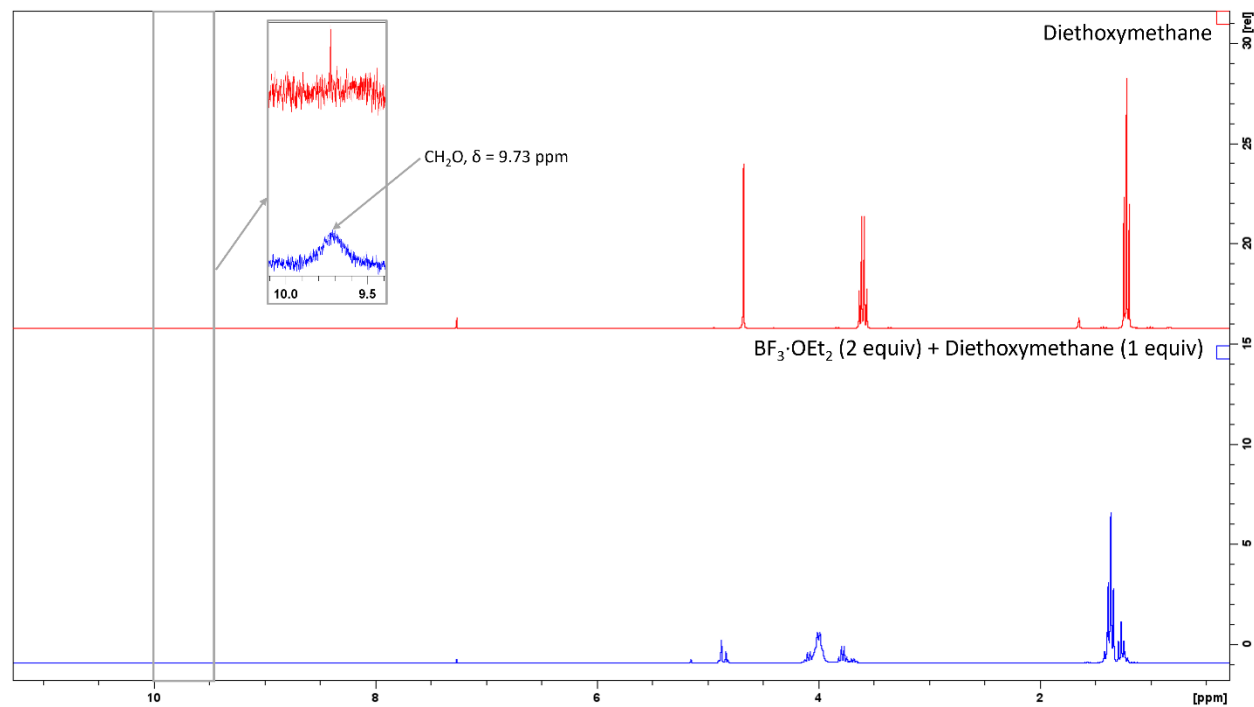

**Figure S2.** Stacked <sup>1</sup>H NMR spectra of diethoxymethane in CDCl<sub>3</sub> and a sample with 2 equiv of BF<sub>3</sub>·OEt<sub>2</sub> added to diethoxymethane in CDCl<sub>3</sub>.

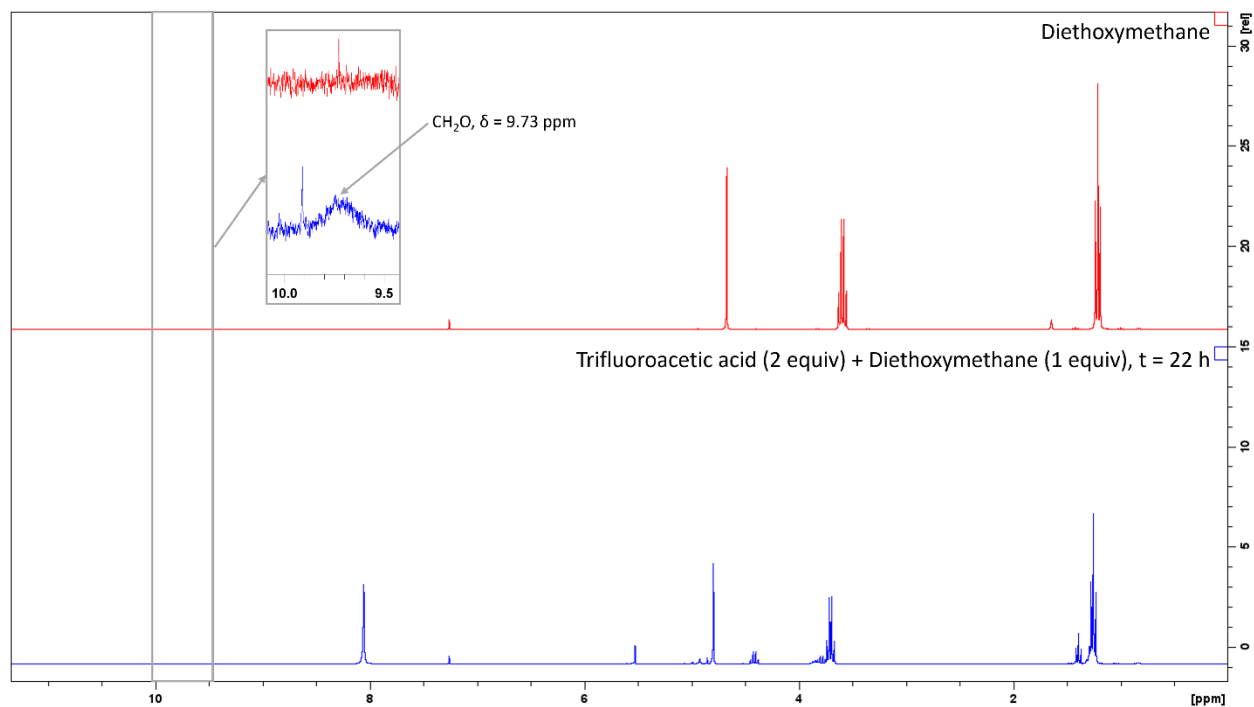

**Figure S3.** Stacked <sup>1</sup>H NMR spectra of diethoxymethane in CDCl<sub>3</sub> and a sample with 2 equiv of trifluoroacetic acid added to diethoxymethane in CDCl<sub>3</sub> measured 22 h after addition.

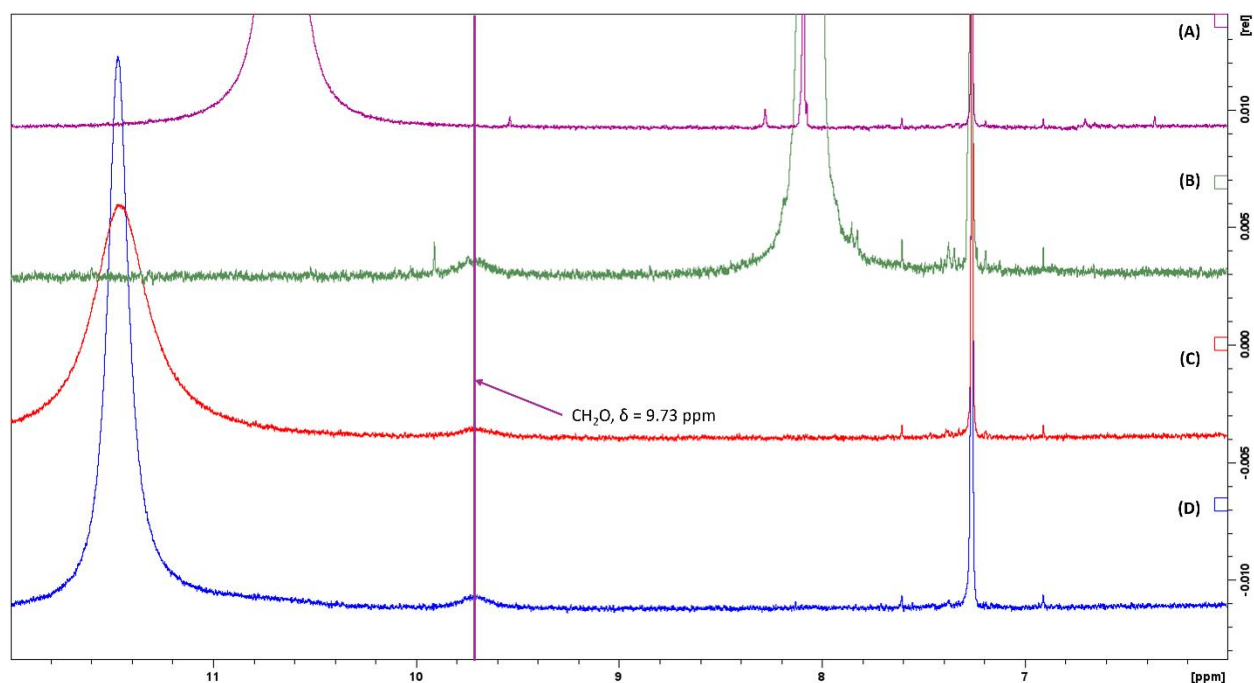

**Figure S4.** Stacked <sup>1</sup>H NMR spectra of (A) a sample with 2 equiv of BF<sub>3</sub>·OEt<sub>2</sub> added to 1,3-dioxolane in CDCl<sub>3</sub> measured 23 h after addition, (B) a sample with 2 equiv of trifluoroacetic acid added to diethoxymethane in CDCl<sub>3</sub> measured 22 h after addition, (C) a sample with 2 equiv of BF<sub>3</sub>·OEt<sub>2</sub> added to dimethoxymethane in CDCl<sub>3</sub> and (D) a sample with 2 equiv of BF<sub>3</sub>·OEt<sub>2</sub> added to diethoxymethane in CDCl<sub>3</sub>.

**Ethoxypillar[5]arene (EtO-PA[5])**

$^1\text{H}$  NMR (300 MHz,  $\text{CDCl}_3$ , 298 K)  $\delta$  (ppm) 1.36 (t, 30H,  $J = 7.0$  Hz), 3.77 (s, 10H), 3.88 (q, 20H,  $J = 7.0$  Hz), 6.81 (s, 10H).  $^{13}\text{C}$  NMR (300 MHz,  $\text{CDCl}_3$ , 298 K)  $\delta$  (ppm) 149.8, 128.5, 114.6, 63.6, 29.6, 15.4. MALDI-TOF calculated for  $\text{C}_{55}\text{H}_{70}\text{NaO}_{10}^+$   $[\text{M}+\text{Na}]^+$  913.486, found 913.571. These spectral data match with the reported data.<sup>2</sup>

**Ethoxypillar[6]arene (EtO-PA[6])**

$^1\text{H}$  NMR (300 MHz,  $\text{CDCl}_3$ , 298 K)  $\delta$  (ppm) 1.29 (t, 36H,  $J = 7.0$  Hz), 3.88 (m, 36H), 6.70 (s, 12H).  $^{13}\text{C}$  NMR (300 MHz,  $\text{CDCl}_3$ , 298 K)  $\delta$  (ppm) 150.6, 128.0, 115.4, 64.1, 31.1, 15.3. MALDI-TOF calculated for  $\text{C}_{66}\text{H}_{84}\text{NaO}_{12}^+$   $[\text{M}+\text{Na}]^+$  1091.585, found 1091.684. These spectral data match with the reported data.<sup>3</sup>

**Methoxypillar[5]arene (MeO-PA[5])**

$^1\text{H}$  NMR (300 MHz,  $\text{CDCl}_3$ , 298 K)  $\delta$  (ppm) 3.70 (s, 30H), 3.79 (s, 10H), 6.83 (s, 10H).  $^{13}\text{C}$  NMR (300 MHz,  $\text{CDCl}_3$ , 298 K)  $\delta$  (ppm) 150.8, 128.3, 113.9, 55.8, 29.6. MALDI-TOF calculated for  $\text{C}_{45}\text{H}_{50}\text{NaO}_{10}^+$   $[\text{M}+\text{Na}]^+$  773.330, found 773.277. These spectral data match with the reported data.<sup>4</sup>

**2-Bromoethoxypillar[5]arene (Br-PA[5])**

$^1\text{H}$  NMR (400 MHz,  $\text{CDCl}_3$ , 298 K)  $\delta$  (ppm) 3.63 (t, 20H,  $J = 5.66$  Hz), 3.85 (s, 10H), 4.23 (t, 20H,  $J = 5.66$  Hz), 6.92 (s, 10H).  $^{13}\text{C}$  NMR (400 MHz,  $\text{CDCl}_3$ , 298 K)  $\delta$  (ppm) 149.8, 129.2, 116.3, 69.1, 30.8, 29.6. MALDI-TOF calculated for  $\text{C}_{55}\text{H}_{60}\text{Br}_{10}\text{NaO}_{10}^+$   $[\text{M}+\text{Na}]^+$  1702.582, found 1702.540. These spectral data match with the reported data.<sup>5</sup>

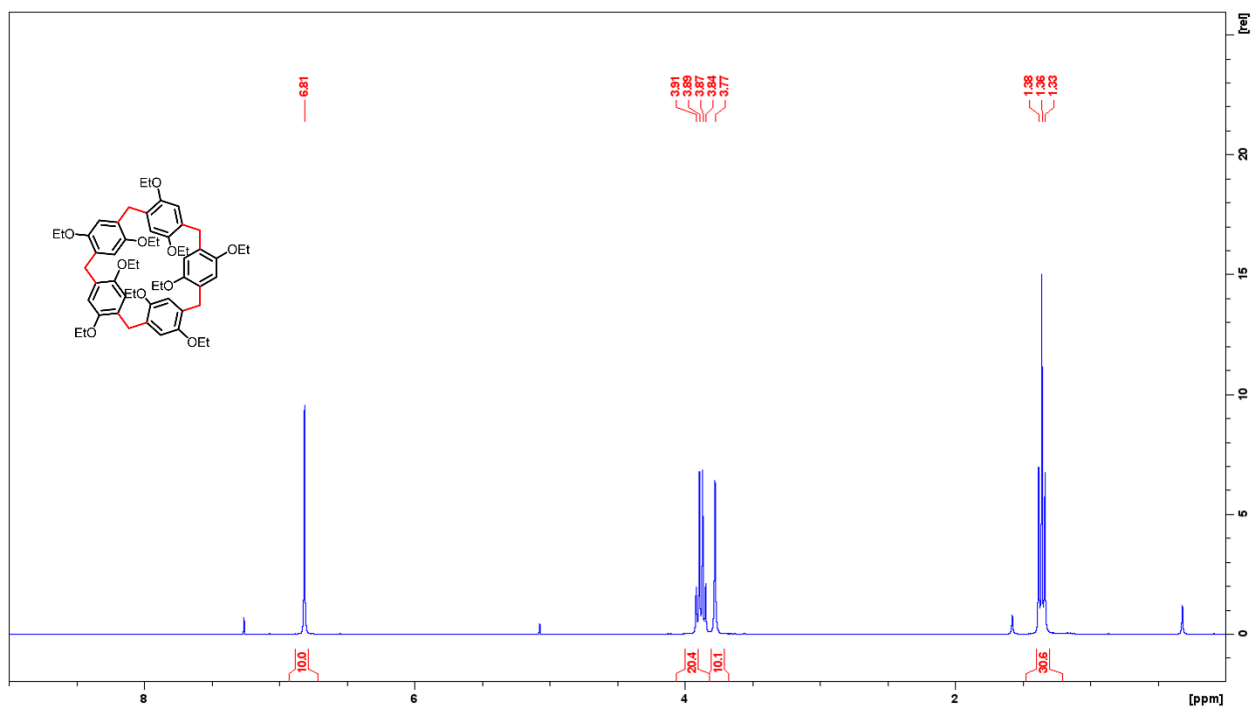

Figure S5.  $^1\text{H}$  NMR spectrum (300 MHz,  $\text{CDCl}_3$ , 298 K) of EtO-PA[5].

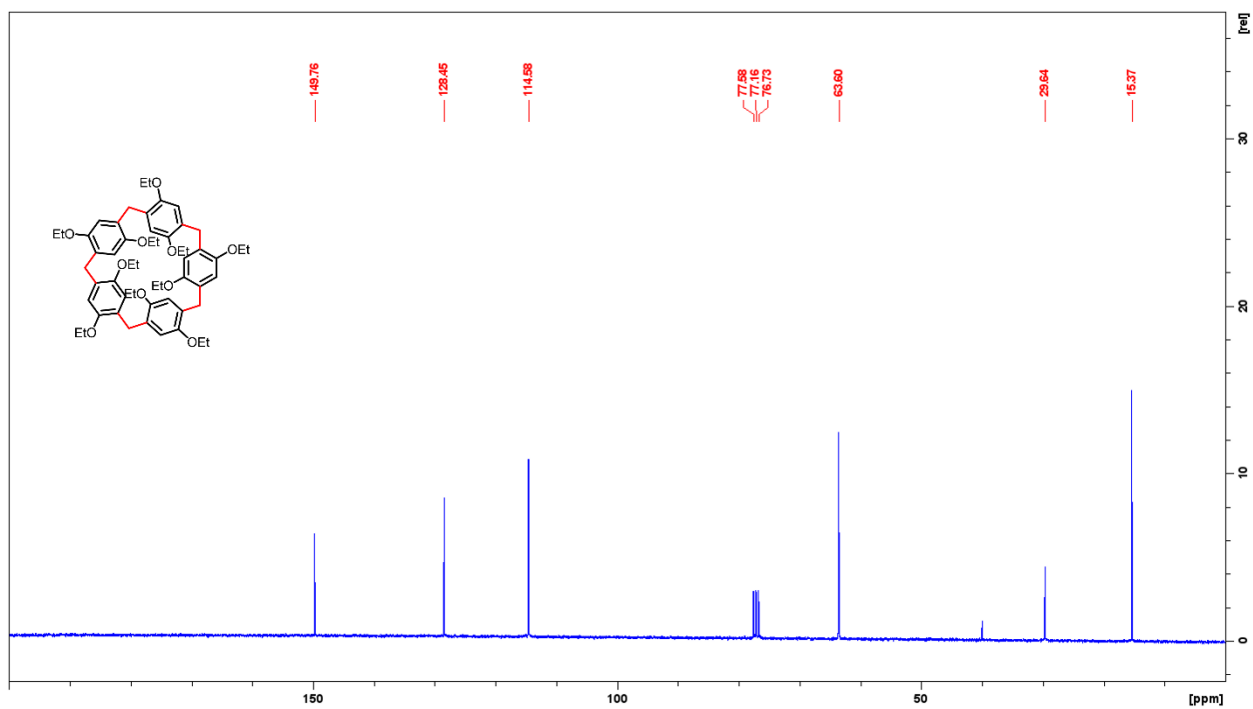

Figure S6.  $^{13}\text{C}$  NMR spectrum (300 MHz,  $\text{CDCl}_3$ , 298 K) of EtO-PA[5].



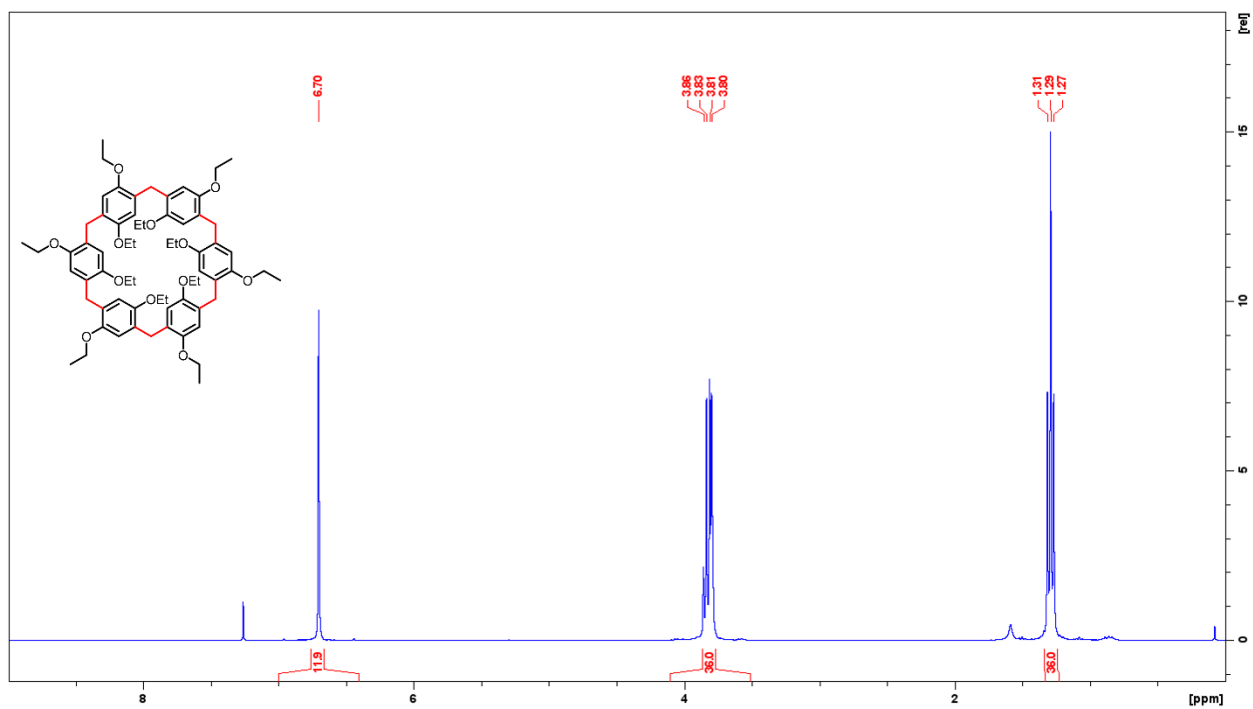

Figure S7.  $^1\text{H}$  NMR spectrum (300 MHz,  $\text{CDCl}_3$ , 298 K) of EtO-PA[6].

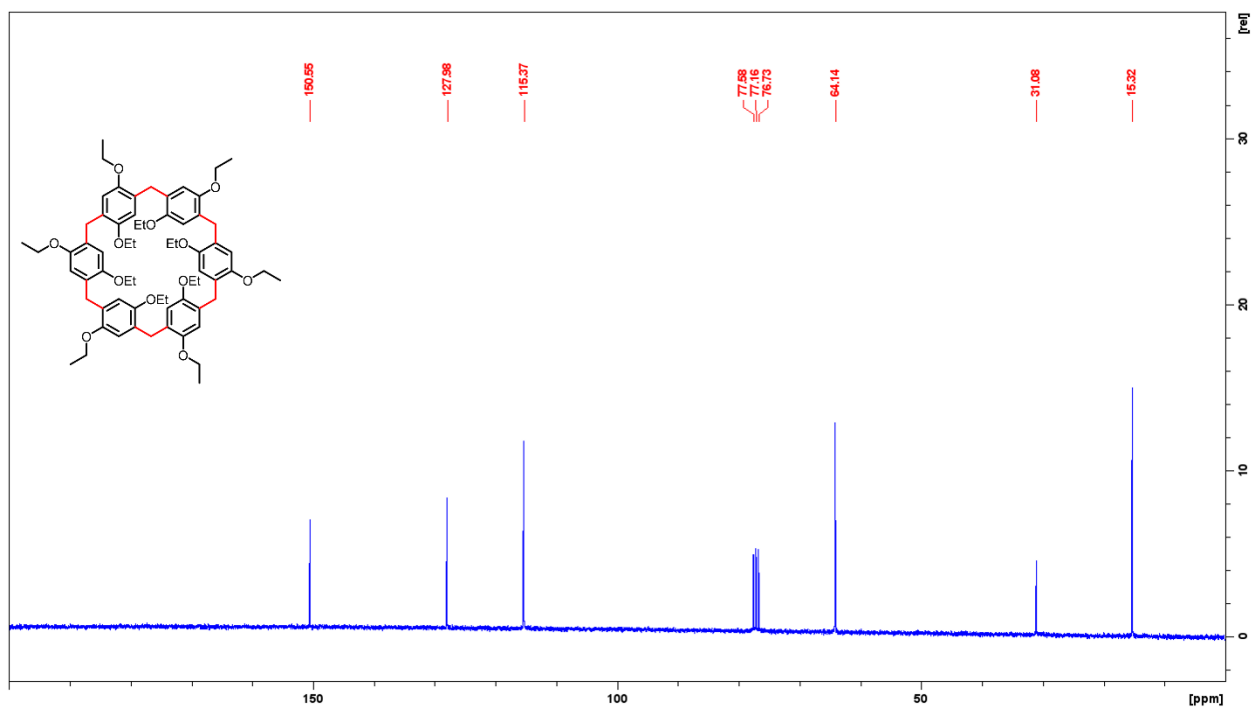

Figure S8.  $^{13}\text{C}$  NMR spectrum (300 MHz,  $\text{CDCl}_3$ , 298 K) of EtO-PA[6].

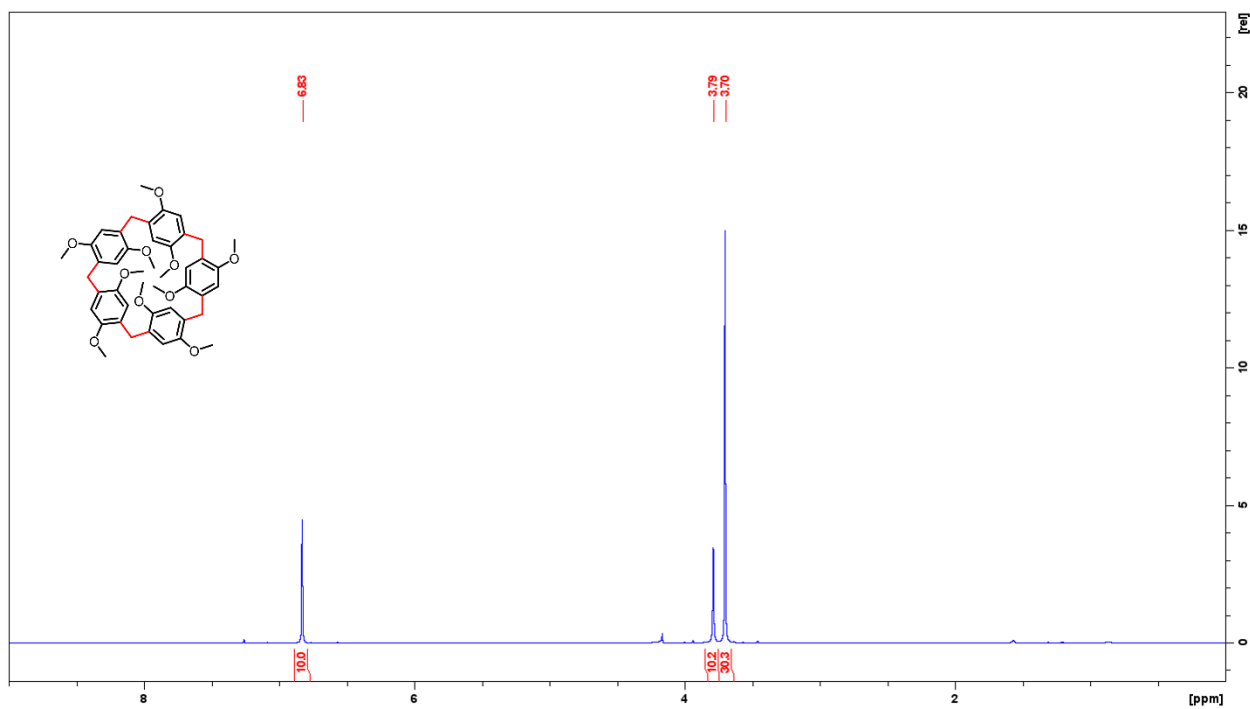

Figure S9. <sup>1</sup>H NMR spectrum (300 MHz, CDCl<sub>3</sub>, 298 K) of MeO-PA[5].

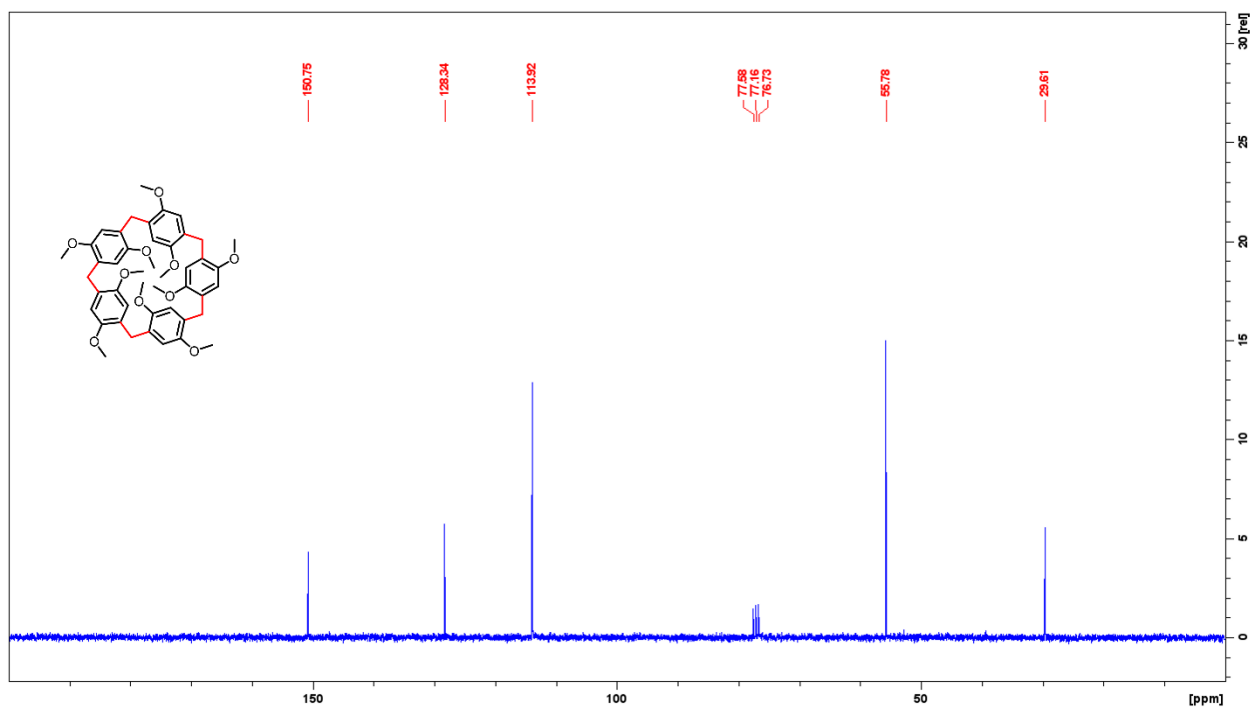

Figure S10. <sup>13</sup>C NMR spectrum (300 MHz, CDCl<sub>3</sub>, 298 K) of MeO-PA[5].

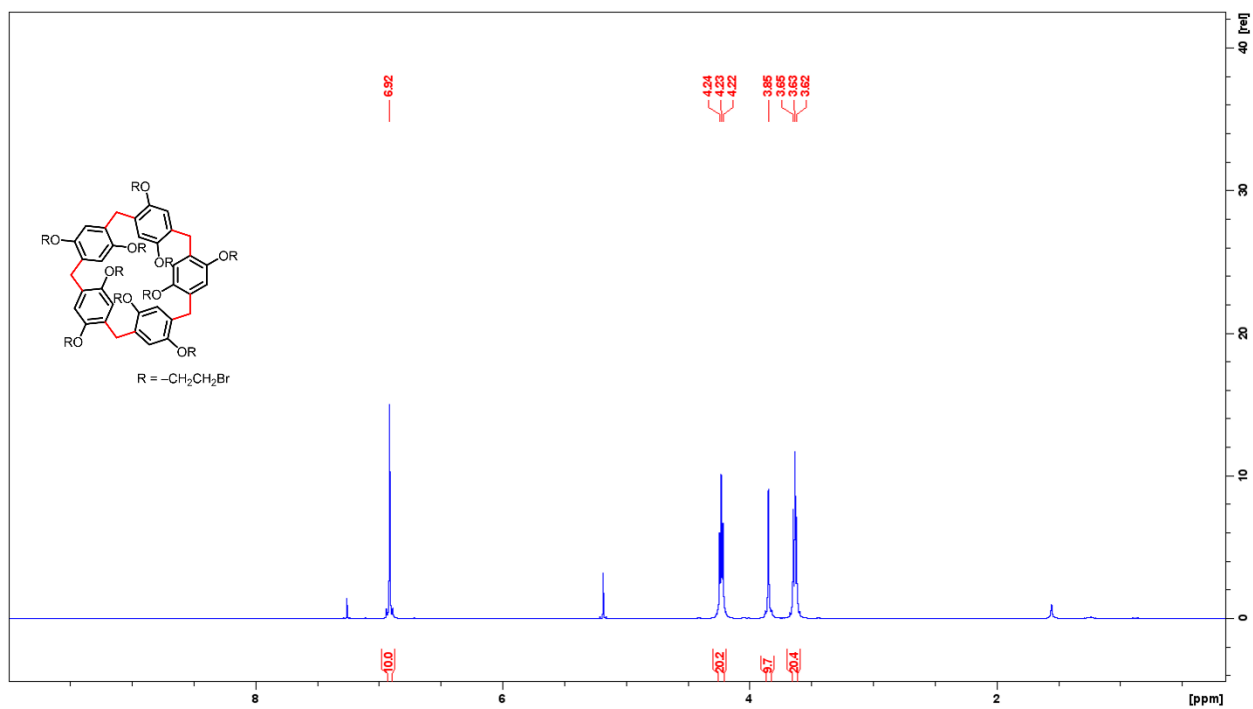

**Figure S11.**  $^1H$  NMR spectrum (400 MHz,  $CDCl_3$ , 298 K) of Br-PA[5].

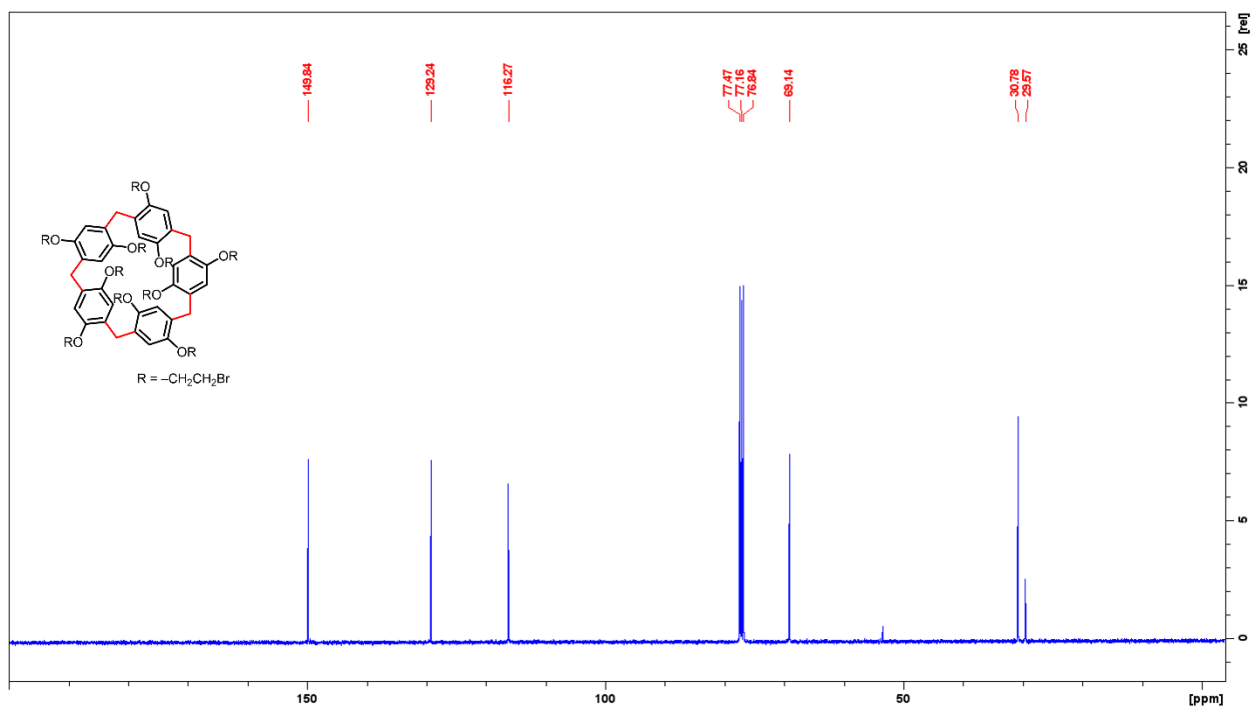

**Figure S12.**  $^{13}C$  NMR spectrum (400 MHz,  $CDCl_3$ , 298 K) of Br-PA[5].

## 5. Pillararene Synthesis in $\text{CHCl}_3$ with Different Stabilizers

**Table S2.** Effect of stabilizer on the synthesis of ethoxypillar[n]arene in chloroform.

| Entry | Equiv |      |                                  | Solvent                                                        | Yield                                                     |
|-------|-------|------|----------------------------------|----------------------------------------------------------------|-----------------------------------------------------------|
|       | DEB   | DEM  | $\text{BF}_3 \cdot \text{OEt}_2$ |                                                                |                                                           |
| 1     | 1.00  | 1.25 | 2.50                             | $\text{CHCl}_3$ (0.05 M), 1% ethanol stabilizer                | 68% DEB recovered, 14% mixture of EtO-PA[5] and EtO-PA[6] |
| 2     | 1.00  | 1.25 | 2.50                             | $\text{CHCl}_3$ (0.05 M), amylene stabilizer                   | 48% EtO-PA[5] and 6% EtO-PA[6]                            |
| 3     | 1.00  | 1.25 | 2.50                             | $\text{CHCl}_3$ (0.05 M), amylene stabilizer and 1% of ethanol | 94% DEB recovered                                         |

## 6. References

1. X. Tan, Y. Wu, S. Yu, T. Zhang, H. Tian, S. He, A. Zhao, Y. Chen and Q. Gou, *Talanta*, 2019, **195**, 472-479.
2. M. Da Pian, C. A. Schalley, F. Fabris and A. Scarso, *Org. Chem. Front.*, 2019, **6**, 1044-1051.
3. Chelsea R. Wilson, Evan F. W. Chen, Austia O. Puckett and F. Hof, *Org. Synth.*, 2022, **99**, 125-138.
4. T. Boinski and A. Szumna, *Tetrahedron*, 2012, **68**, 9419-9422.
5. P. U. A. I. Fernando, Y. Shepelytskyi, P. T. Cesana, A. Wade, V. Grynko, A. M. Mendieta, L. E. Seveney, J. D. Brown, F. T. Hane, M. S. Albert and B. DeBoef, *ACS Omega*, 2020, **5**, 27783-27788.
